# Supplementary material for: Uriclarity Program Reduces Perceived Insufficient Milk Supply in Early Postpartum: Randomized Controlled Trial
Source: Research Square preprint supplement (doi:10.21203/rs.3.rs-8634552/v1), 2026-01-29
Supplement: Supplementary file 1 [file 38b8ea4b07a8142f5e09a7ed.docx]

**APPLICATION PROTOCOL**

Effect of the Uriclarity Program on PIMS (2025)

**Table of contents Pag.**

1. **GENERAL INFORMATION** 3
2. Description 3
3. Purpose 3
4. General objective 3
5. Specific objectives 3
6. Target population 3
7. Program phases 3
8. Methodology 3
9. Duration of the face-to-face phase 4
10. Date and time of the session 4
11. Number of facilitators per session 4
12. Number of postpartum women per session 4
13. Glossary 4
14. **FACE-TO-FACE PHASE** 4
15. Pre-session activities 5
16. Start of session 5
17. Follow-up information 6
18. Development of the training 7
19. How important breastfeeding is 7
20. Risks of artificial feeding 8
21. Signs of hunger in the baby 10
22. What normal growth in babies looks like 13
23. Breastfeeding positions 14
24. Manual breast milk expression 17
25. How I calm my baby’s crying 21
26. How I know if my baby is getting enough milk 23
27. What I do if my baby is not getting enough milk 25
28. **DIGITAL PHASE** 27

Digital kit 27

1. **First video package**  27
2. **Second video package**  28

Annexes 29

Annex 1. REQUIRED RESOURCES 29

Annex 2. CHECKLIST 31

Annex 3. ALIGNMENT MATRIX 32

**APPLICATION PROTOCOL OF THE URICLARITY PROGRAM**

Study Effect of Uriclarity on PIMS 2025

1. **GENERAL INFORMATION**
2. **Description:**

A structured intervention for mothers delivered in two phases: (1) a face-to-face group training workshop on breastfeeding that addresses key risk factors for perceived insufficient milk supply (PIMS), and (2) standardized WhatsApp messages and short videos delivered during the first two days after the workshop.

1. **Purpose:**

To reduce PIMS, support exclusive breastfeeding in the early postpartum period, and prevent total or partial weaning related to PIMS.

1. **General objective:**

To train postpartum women in the prevention and management of PIMS.

1. **Specific objectives:**

- To empower postpartum women with key information to prevent PIMS.
- To improve postpartum women’s self-efficacy.
- To equip postpartum women with skills to monitor milk transfer.

1. **Target population:**

Postpartum women aged ≥18 years, 24-48 h after term birth, exclusively breastfeeding (study participants).

1. **Program phases:**

- **Face-to-face**: two-hour face-to-face training workshop.
- **Digital**: digital reinforcement of the topics from the face-to-face training, through short tutorial videos (≤3 minutes), sent via a WhatsApp group during the first two days after the workshop.

1. **Methodology:**

The Uriclarity Program is delivered in two phases. The face-to-face phase includes the central strategy: an experiential workshop with intense interaction between facilitator and participants, based on an experiential learning methodology (“learning by doing”). During the group session, postpartum women practice the trained skills in a guided manner, using physical materials that are provided in the workshop itself.

Enjoyable learning dynamics are used, without multimedia presentations, in order to foster participation and content retention.

In the digital phase, reinforcement is provided through brief tutorial videos of up to 3 minutes, which are sent through a WhatsApp group during the first two days after the workshop, with the aim of improving recall and practice, and supporting the application of the trained skills at home.

1. **Duration of the face-to-face phase:**

2 hours (120 minutes).

1. **Date and time of the face-to-face phase:**

On the day of hospital discharge, generally 24 to 48 hours postpartum.

1. **Number of facilitators per session:**

Two facilitators trained in Uriclarity (e.g., nurses, physicians, or other health professionals). Preferably female to enhance participant comfort, taking intercultural considerations into account.

1. **Number of postpartum women per session:**

From 2 to 10 postpartum women. Relatives or companions may attend if the mother wishes.

1. **Glossary:**

Infant simulator: infant doll used for demonstrations.

Breast model: cloth/knitted breast model used for demonstrations.

Newborn stomach models: cloth/knitted models illustrating newborn stomach size.

1. **FACE-TO-FACE PHASE**

Before entering the workshop room, participating postpartum women will be asked to wash their hands, as the session includes a practical demonstration of hand expression and requires clean hands. When they return to the room, they will sit in a circle, leaving a space so that the facilitators can sit with them and place the flip charts with their stands on the floor and the other materials on a table. Immediately afterwards, they will be told:

*“On behalf of the Crianzamor research team, welcome. Before we begin, please wash your hands, as we will practice hand expression and need clean hands. You may leave your belongings on the table and keep your baby with your companion, or place your baby on the stretcher/crib.”*

1. **Pre-session activities: (Total duration = 10 minutes)**
2. **Start of session:**

**Approximate duration:** 5 minutes

**Materials:** Checklist, blue pen, correction tape/fluid.

**Facilitator 1 introduces the session and explains that participants will be invited to join a WhatsApp group for study follow-up.** She uses the Checklist to send an invitation message and guides participants on how to accept it.

*“Hello, we are [First name Last name] and [First name Last name] from the Crianzamor research team. Thank you for agreeing to participate. As part of the study, we will invite you to join a WhatsApp group for follow-up; please accept the invitation. If you have any questions or concerns, please let us know.”*

**Facilitator 2 distributes the ‘Mothers’ Kit’.** Kits are prepared in advance (female/male) depending on whether they include cotton underwear for a baby girl or cotton underpants for a baby boy.

*“As part of the study we will also be providing you with the Mothers’ Kit, which is a small box that contains:*

- *3 white gauze cloth diapers.*
- *3 cotton underwear for your baby*
- *1 self-adhesive poster that you must stick on the wall of your bedroom: Signs of hunger.*
- *1 spiral-bound booklet with important information.*
- *1 rattle bottle (homemade rattle).*
- *1 little spoon.”*

**Note:** The activity of facilitator 2 begins as soon as facilitator 1 stops speaking. Activities that do not require a group message may be carried out simultaneously, and facilitators support each other to complete tasks efficiently. Facilitators use the Checklist for this activity.

1. **Follow-up information**

**Approximate duration:** 5 minutes.

**Materials:** Checklist, blue pen, correction tape/fluid.

**Facilitator 1 informs participants of the first and last name and mobile phone number of the staff member responsible for follow-up.** If this person is not present, the facilitator shares the information and asks each mother to save the contact in her phone. She also asks each mother to save the contact information provided in her mobile phone directory.

*“Researcher [First name Last name] will be responsible for follow-up. If you receive a call or message from this number, please respond. Please save the following contact in your phone: [Researcher name] – [number]. We recommend saving it as ‘Researcher [First name Last name]’. So, for example, it would look like this: ‘Researcher Pedro Pérez’.”*

**F**acilitator 2 will provide information about the follow-up dates for administering the MILQ (Maternal Insufficient Lactation Questionnaire) and the request to report the Ashiyama Uriscale (AUS).

*“The researcher (first and last names) will contact you on days 3, 7 and 14 of post-workshop. Please watch for calls and WhatsApp messages from this number on those days. On those dates, the researcher will ask you to provide key study information.”*

1. **Development of the training: (Total duration = 110 minutes)**
2. **How important is breastfeeding: (cumulative 7 minutes)**

**Approximate duration:** 7 minutes

**Materials:** baby and poster: Importance of breastfeeding.

**Activity of facilitator 1:** facilitator 1, cradling her baby, will say:

*“We will begin with the topic How important is breastfeeding, and we are going to work on it with the activity: I introduce my baby. To play, each mother will say:*

*Hello, my name is [Name]. This is my baby, and I want my baby to grow up [healthy/strong/happy—any positive adjective].”*

**Facilitator 2**, smiling at the audience, shows her baby, whom she is cradling, and says:

*Hello everyone, I am (her name), this is my baby and I want him to grow up healthy.*

**F**acilitator 1, in a friendly and enthusiastic tone, says:

*“Now it’s your turn. Let’s start here.”*

*She points to a participant who seems more comfortable starting.*

**F**acilitator 2, while maintaining a friendly smile to encourage the postpartum women to continue, approaches each participant and quietly encourages her to continue:

*“Now it’s your turn* *— go ahead!”*

When all the postpartum women have introduced themselves, facilitator 1 will show the poster **Importance of breastfeeding** and will say:

*“Everything you want for your babies and more, breastfeeding will help you achieve it. Because, as you can see on the poster, breast milk is more than food; it contains antibodies and nutrients that support your baby’s growth and development.”*

1. **Risks of artificial feeding: (cumulative 15 minutes)**

**Approximate duration**: 8 minutes

**Materials**: baby, 3 small hand signs per mother reading TRUE, FALSE, I DON’T KNOW; poster 1 “Infant formula is equivalent to breast milk in all health benefits”; poster 2 “Introducing formula supplementation can lower the production of breast milk”; poster 3 “Formula feeding tends to be costly for families over time”; poster: Risks of feeding with formula and bottle; 1 can of formula without label and 1 bottle.

**Facilitator 2 will hand out 3 small hand signs to each mother, while the other facilitator continues explaining.**

**Facilitator 1 holds a sample of each little sign in her hands and, while showing them in the order in which they will be used, says:**

*“Each of you has three small hand signs that say: TRUE, FALSE, I DON’T KNOW.*

*When we show you the posters, you will raise your small signs according to what you know. Don’t worry if you don’t know or if you make a mistake; we are here to learn all together.”*

**Facilitator 2 shows poster 1 and says:**

*Infant formula is equivalent to breast milk in all health benefits*

*“Is that true, false, or don’t you know? Please hold up the sign that matches your answer.”*

**Facilitator 1**:

*“Thank you. That’s how the activity works—please use your signs to answer each statement. We will move on to the next poster.”*

**Facilitator 2 shows poster 2 and says:**

*Introducing formula supplementation can lower the production of breast milk.*

*“Is that true, false, or don’t you know? Please hold up the sign that matches your answer.”*

**Facilitator 1:**

*“Thank you for answering. We will move on to the next poster.”*

**Facilitator 2 shows poster 3 and says:**

*Formula feeding tends to be costly for families over time.*

*“Is that true, false, or don’t you know? Please hold up the sign that matches your answer.*

*Thank you for playing with us.”*

**F**acilitator 2 will show the poster **Risks of feeding with formula and bottle**, while her colleague continues with the workshop.

**F**acilitator 1 holds a can of formula without label and a bottle in her hands, approaches the poster and says:

*“There is limited discussion about the risks of feeding children with formula and bottles, even though scientific evidence has shown them in many publications. Let’s look at these risks.*

*Did you know that children who are not breastfed and are given formula are at greater risk of becoming ill and dying?”*

She waits for answers and thanks them, then continues:

*“Indeed, children who are not breastfed and who are fed with formula and bottles present a series of complications, such as, for example:*

- *More infections,*
- *more overweight,*
- *more anemia and*
- *more allergies.*
- *More expenses for the families,*
- *less development of intelligence and*
- *less milk in mothers who give bottles and formula.*
- *Mothers also get sick more when they do not breastfeed.*

*That is why it is important to breastfeed exclusively, not to give them anything other than breast milk until they are 6 months old. After that age, they will continue breastfeeding and will also eat healthy foods.*

*Despite these risks, it is common to see mothers who give bottles and formula. This does not happen because they are bad mothers, but because they may be unaware of the risks of artificial feeding, may be misled by aggressive formula marketing, and may receive poor advice from some health professionals who recommend formula even when it is not needed.*

*Formula should be used only in specific situations, for example when the mother has an HIV infection or is undergoing chemotherapy, and we should not see so many people using it. However, in practice we often see something different: many mothers use it, perhaps because they had some problem with breastfeeding and did not receive appropriate help, and not knowing what the risks are, they were encouraged to try it. Later it is difficult to stop using it, because milk production decreases, the baby gets used to it and no longer wants to breastfeed at the breast.*

*Do you have any experience or questions about this?”*

Comments will be heard; if there are questions, they will be answered, and finally, the participants will be thanked.

1. **Signs of hunger in the baby: (cumulative 25 minutes)**

**Approximate duration**: 10 minutes

**Materials**: baby, newborn stomach models, poster: ‘Signs of hunger’, poster: ‘Colostrum: scarce but powerful’.

**Facilitator 2**:

*“We will now cover the topic ‘Signs of hunger in the baby’. Many mothers think they do not have enough milk because the baby cries frequently or wants to feed often, which can make them feel they are not producing enough.*

*How often should we breastfeed?”*

She will wait for the answer and thank them, then say:

*“Babies cannot talk, but their cues and body language tell us when they want to breastfeed.”*

**Facilitator 1 will simultaneously show the poster ‘Signs of hunger’ and say:**

*“Babies show hunger through EARLY cues. If we do not offer the breast then, they may become upset and show INTERMEDIATE cues. If even more time passes, they may show LATE cues. Crying is a LATE hunger cue—it usually means the baby has waited a long time and is very upset, which can make breastfeeding harder.*

*When is the best time to breastfeed?”*

**Facilitator 1, pointing to the different hunger levels on the poster, will say:**

*“When they look like this—this—or this?”*

And if no one answers, she says:

*“We should breastfeed when babies show EARLY hunger cues, before they become upset. That is, we should not wait until they cry to give them the breast; otherwise, breastfeeding can become complicated. Feeding early also helps maintain milk supply.*

*Now, I’d like each mother to look at her baby and tell me: what do your baby’s face and body tell you? How do you think your baby feels right now—content, or possibly hungry?”*

She will wait for the answers and thank them.

**Facilitator 2 checks whether any babies are showing hunger cues and addresses the relevant mother directly**:

*“Your baby is showing signs of hunger. I recommend putting your baby to the breast now.”*

**Then looking at all the mothers, says:**

*“Remember: breastfeeding when your baby shows EARLY hunger cues helps keep breastfeeding calm and supports milk supply.”*

**While some mothers begin breastfeeding, facilitator 1 will show the poster ‘Colostrum: scarce but powerful’ and say:**

*“In addition, many mothers think they do not have milk because during the first 3 days they only get a few drops; but as you can see on the poster, the baby’s stomach is so tiny that he/she only needs the amount of colostrum produced during those days, as long as you breastfeed frequently.*

*On the 3rd or 4th day after birth, a plentiful milk supply will come in and you may notice your breasts becoming fuller and firmer. This happens because the baby is already prepared to receive more milk, and there will be more milk each day the more often you breastfeed.*

*It is important to emphasize that colostrum comes only in drops, but it is a nutritional marvel; it is the baby’s first super-vaccine and scientific studies* *have shown that frequent breastfeeding helps newborns receive small amounts of colostrum repeatedly.*

*So then, at what point should we give them the breast?”*

She will wait for answers and thank them, then, while pointing to the early signs, will say:

*“We should breastfeed them when they are like this, showing EARLY signs of hunger so that they do not get upset and we have more and more milk. Do not wait until they cry to give them the breast.”*

1. **What normal newborn growth looks like: (cumulative 30 minutes)**

**Approximate duration**: 5 minutes

**Materials**: poster: Normal growth in the newborn; poster: ‘Colostrum: scarce but powerful’; poster: ‘Tip for having more milk’.

**Facilitator 2 places the poster titled ‘Normal growth in the newborn’.**

**Facilitator 1**:

*“Next, we will discuss what normal newborn growth looks like. Let’s look at this poster.*

*As we can see on the poster, newborns lose weight for about 5 days after birth and then begin to regain it. Do you know why newborn babies lose weight?”*

Facilitator 1 will look at the mothers to see if anyone wants to answer and will thank the answer. If no one answers, she will repeat the question and invite one of them to answer; she will listen to her and, after thanking her, will say:

*“Newborns lose weight because they are born with extra fluid and lose some of it after birth, and also because mothers normally produce small volumes of colostrum in the first two to three days. Remember that colostrum is scarce but powerful.*

*The problem is that sometimes some babies lose too much weight because their mothers wait until they cry to breastfeed them, that is, they do not respond to their early hunger signals, usually because they think it is wrong to offer the breast too often as it will ‘spoil’ the baby. But they actually need to breastfeed VERY FREQUENTLY because their stomach is small and,* *if breastfeeding is infrequent, newborn weight loss may be greater and the onset of copious milk production may be delayed.”*

**F**acilitator 2 will show the poster ‘Tip for having more milk’ and say:

*“So, what can we do to make more milk and help our babies gain weight well?*

*So my baby doesn’t lose too much weight and my milk comes in well,*

*I will breastfeed often, day and night, and I won’t wait until my baby cries*

*I will read it again and this time please repeat it with me.”*

The facilitator will let the mothers read it twice until they can repeat it in unison until everyone can say it together. Then she will thank them for their support.

1. **Breastfeeding positions: (cumulative 60 minutes)**

**Approximate duration**: 30 minutes

**Materials**: baby and breast, 2 pillows, poster: Breastfeeding positions, poster: Deep latch at the breast.

**Facilitator 2 will show the poster for the topic and say:**

*“Next, we will talk about breastfeeding positions. Here are some common positions, and we will practice a few that many mothers find helpful. Let’s start with the cradle hold (CH).*

*If your babies are asleep, don’t worry—you can practice the positions with a doll. If they wake up, you can try breastfeeding then; remember that the more often you breastfeed, the more milk you will have.”*

**Facilitator 1, with baby and breast, will show the postpartum women the CH and invite them to adopt it.**

*“It is important that you do what you see me doing. My colleague and I are going to guide you:*

*First, you should be sitting comfortably with your feet elevated; you can place a small stool or something to rest them on.*

*Second, hold your baby with one hand on his/her bottom and the head in the bend of your elbow.*

*Third, the baby should be turned toward you, tummy to tummy.*

*Fourth, the free hand should guide the breast toward the baby’s mouth.”*

**Facilitator 2 will help the postpartum women achieve the CH by providing support according to each woman’s needs and will ask them**:

*“How do you feel in this position?”*

She will wait for their comments and thank them for participating.

**Facilitator 1, with her baby and breast, will show the mothers the cross-cradle hold (CCH) and invite them to adopt it.**

*“Now we are going to practice the cross-cradle hold. Please follow along so you can try it at home. This is a great position:*

*First, sit down and hold your baby’s head with the hand opposite to the breast you are going to offer, just as you see me doing.*

*Second, it is important that the baby be turned toward you, tummy to tummy.*

*Third, the other hand will guide the breast toward the baby’s mouth.*

*This position can give you more control and help your baby latch more easily.”*

**Facilitator 2 will help the postpartum women to adopt the CCH, offering support according to each woman’s needs, and will ask them:**

*“How do you feel in this position?”*

She will wait for their comments and thank them for participating.

**Facilitator 1, with her baby, her breast and using a pillow behind her back, will show the postpartum women the biological nurturing (BN) position and explain how to adopt it.**

*“Now we’re going to practice the laid-back breastfeeding position (biological nurturing). You can do this in bed with a few pillows. Please follow along so we can do it together:*

*First, lean back. At home, your chest should be uncovered for skin-to-skin, but here we will not remove clothing.*

*Second, place your baby on your chest, as you see me doing.*

*Use your hands to support your baby safely. Try not to press—let your baby find the breast and latch, just like you see me doing. Now we will practice in pairs.”*

**Facilitator 2 will help those mothers who wish to practice BN, bearing in mind that not all of them will feel comfortable trying it on a chair with only a pillow, especially those who had a cesarean delivery.**

*“What do you think of this position?”*

She will wait for their comments and thank them for participating.

*“We will send you a video so you can practice these positions at home.”*

**Facilitator 1 will show the poster ‘Deep latch at the breast’ and say:**

*“Now we will see How to achieve an adequate latch at the breast, because otherwise there is pain and nipple wounds and breastfeeding becomes complicated. Look at the poster to see the signs that you are achieving a good latch; the baby has:*

1. *The mouth wide open,*
2. *The chin well attached to the mother’s breast,*
3. *The lower lip everted, that is, turned outward,*
4. *And you can see more areola above than below his/her mouth.*

*We are going to practice with my colleague, and it would be good for you to try to wake your babies who have not yet breastfed since the beginning of the workshop, so that they can breastfeed now.”*

**Facilitator 2**:

*Please follow me step by step in order to achieve a good latch at the breast:*

*First, we will get into a comfortable position, repeating what we have already learned about positions. Each one may choose the one she prefers; you can look at the positions poster which is on that stand.*

*Second, we gently touch the baby’s lower lip with the nipple and, when they open their mouth wide, we bring the breast into the mouth. We may need several attempts until your baby opens wide.*

**Both facilitators will help mothers choose positions they prefer and achieve a good latch. They will encourage them throughout, even if it is not perfect at first.**

*“Don’t worry if you don’t get it perfectly right. We will send you a video in the WhatsApp group so you can keep practicing at home. Remember that having a good position and a good latch when breastfeeding will help you to have more milk and to help prevent nipple pain and cracks.”*

1. **Manual breast milk expression: (cumulative 75 minutes)**

**Approximate duration**: 15 minutes

**Materials**: poster: ‘How I express my milk’; breast; baby; small spoon; clean recycled glass jars (e.g., jam/coffee jars) with plastic lids.

**Facilitator 2 will show the poster for the topic and say:**

*“Next, we will talk about hand expression. Let’s look at this poster. To express milk, we first wash our hands well. Then we massage the breast and use gentle compressions to express the milk.*

*Now I will demonstrate. To help everyone feel comfortable, we will ask male companions to wait outside during this exercise.”*

**Facilitator 1 accompanies the male relatives as they leave, saying:**

*“Gentlemen, please step outside for a moment—just for this exercise. Please take the babies with you so the mothers can keep their hands free while practicing.*

*Mothers who do not have companions may place their babies on the stretcher (or cribs).”*

**Facilitator 2 says:**

*“To make this easier, please follow along on your own breast while I demonstrate.*

*Everyone, please take the small spoon from the kit. We will use it later.”*

**The facilitator sits facing the mothers and says:**

*“Let’s begin calmly. It’s important to be comfortable and relaxed. Because you gave birth recently, you may only see a few drops at first. That is normal. You already know that colostrum is the name given to the milk produced in the first days and that it is the most powerful natural vaccine that babies have, so even small drops are valuable for your baby. We will collect the drops with the small spoon from the kit. Now we will practice together—please do what I do:*

***Step 1: breast massage***

1. *Place the pads of 3–4 fingers of one hand on the outer part of the breast, far from the nipple.*
2. *Press gently toward the ribs and make small circular movements without sliding your fingers over the skin (as if “kneading” in a single spot) and count about 5 circles at each spot.*
3. *Move from spot to spot, going around the whole breast and gradually approaching the areola (like a spiral that moves toward the center).*
4. *Repeat the same on the other breast*.
5. *Now place the pads of your fingers on the upper part of the breast, near the chest wall.*
6. *Gently slide your fingers toward the areola, as if you were moving the milk toward the nipple.*
7. *Repeat from different points: above, on the sides, and from below the breast toward the areola.*
8. *You may finish with very gentle shakes of the breast, holding it with both hands to help release the milk.*
9. *Place the thumb above the areola and the index finger below it, forming a “C”.Bring the fingers toward the ribs (backwards) and then gently compress toward the nipple a few times.*
10. *You may roll the nipple very gently between thumb and index finger for a few seconds, without pinching or pulling hard. This helps trigger the milk ejection reflex.*
11. *Do not forget to repeat this on the other breast.*

*Keep in mind that the massage should not hurt and it is preferable to avoid creams or oils that might leave residues near the nipple.*

***Step 2: milk expression***

1. *With the other hand, take the clean container where the milk will be collected: a glass or glass jar, spoon or little spoon. In our case, when the drop of milk appears, you can place the little spoon under the nipple to collect it.*
2. *Place the hand in a “C” shape, 2–3 cm from the nipple, over the areola, with the thumb above and the other fingers below.*
3. *Press inwards, toward the chest wall, without sliding your fingers over the skin.*
4. *Maintain the compression while bringing the thumb and index finger closer together, as if joining them behind the nipple.*
5. *Hold for 1 second and then release.*
6. *Repeat the procedure.*
7. *Rhythm: press in – compress – release, continuously, without pinching the nipple.*
8. *Rotate the hand around the areola.*
9. *Move the “C” to different positions, as if the breast were a clock: at 12, then at 3, 6, 9, and so on, alternating, to empty different ducts.*
10. *Alternate between breasts.*
11. *When the flow decreases, switch to the other breast.*
12. *You may do several “rounds”: right–left–right–left until the milk comes out in drops or very little.*
13. *Lean forward so that the drops are not lost and you can use the little spoon to collect them as soon as they appear*.”

**Facilitator 1, with a small spoon and her baby, will be attentive for the moment when milk begins to appear in some mothers and will explain:**

*“We can place the drops we are expressing directly into the baby’s mouth, as you see me doing right now.”*

**Facilitator 1 shows supplementation with the small spoon and then continues:**

*“You can also store breast milk in the refrigerator in a glass jar with a plastic lid. This can be a clean, recycled glass jar (for example, a jam or coffee jar) with a plastic lid. Wash it well and keep it clean, as you see here.”*

The facilitator will show examples of recycled glass jars.

*“In the refrigerator it will last for a maximum of 3 days, and in the freezer for up to 3 months; we use an easy ‘rule of three’: 3 days in the refrigerator and 3 months in the freezer. If you want to warm it, first thaw it in the refrigerator and then warm it in a bowl of warm water, not directly on the stove or over a flame.*

*You’re doing great. With practice, it will get easier. We will also send you a short video so you can keep practicing at home.”*

**Facilitator 2 will check that everyone is comfortable and covered again, and invite companions back into the room with the babies.**

*Gentlemen, you may come back into the room now. Thank you for waiting.*

1. **How I calm my baby’s crying: (cumulative 85 minutes)**

**Approximate duration**: 10 minutes

**Materials**: poster ‘How I calm my baby’s crying’; rattle bottle; mobile phone with the song ‘Shipibo Enamorado’ ready to play; baby; breast and safety pin.

In the present study, the song ‘Shipibo Enamorado’ is used (for an interculturality approach). In other contexts, any song with a cheerful and danceable rhythm that favors rhythmic movement may be used.

**Facilitator 1 will show the poster ‘How I calm my baby’s crying’ and, holding the rattle bottle, will say:**

*We will continue with the topic How I calm my baby’s crying.*

*Some babies are healthy but so cranky that their mothers cannot breastfeed them easily. At this point, it is helpful to remember that since they cannot talk, they communicate through signals or crying, especially when they are upset, for example when they are not given the breast on time. We will avoid that by being attentive so we can breastfeed them at EARLY signs of hunger. However, there are other situations, such as when they cannot fall asleep or when we change their diapers, in which the baby gets fussy and even refuses to breastfeed. For this we have two useful strategies:*

**While her colleague continues speaking, facilitator 2 will be seated with the baby simulator as if trying to breastfeed.**

**Facilitator 1, showing the rattle bottle, will explain and demonstrate how to use it:**

1. *“You have the rattle bottle in your kit; please take it out. It may seem like something very simple, but you will be surprised when you use it. Let’s imagine that my colleague’s baby is crying and does not want to breastfeed.”*

**From this moment on, facilitator 2 will pretend that she is trying to breastfeed, that her baby rejects the breast, and she will imitate a baby crying until almost the end of the first step, while her colleague continues speaking.**

**Facilitator 1**:

*“Everyone, let’s try to calm this baby. Please copy my movements:*

*First, we will shake the rattle bottle quickly to calm his/her crying.*

*Second,* *we will try to breastfeed while we keep shaking the rattle bottle gently.”*

**For the second step, facilitator 2 will pretend that she is trying to breastfeed.**

**Facilitator 1:**

*“Third, if he/she starts crying again and rejects the breast, we will shake it vigorously again.”*

**For step 3, facilitator 2 will pretend that her baby has started to cry again and that with the sound of the rattle bottle he/she calms down; she will then try to breastfeed again while her colleague continues speaking.**

**Facilitator 1**:

*“Fourth, once the baby is no longer crying, we will try to offer the breast again. If he/she latches on, we will keep the sound softer and slower, and then stop.”*

**Facilitator 2 will pretend that she is now breastfeeding.**

**Facilitator 1**:

*“If he/she does not calm down and continues to be cranky, we will use the tete dance strategy.*

1. ***Tete dance.*** *It’s an easy and fun strategy: you gently dance with your baby, and you can combine it with the rattle bottle.”*

**Facilitator 2 will have pinned the breast model to her chest and, with her baby in her arms as if about to breastfeed, will follow facilitator 1 instructions.**

**Facilitator 1 will turn on the song “Shipibo Enamorado” and say:**

*“Just as you see my colleague dancing with her baby, you imitate her as much as you can. The tete dance is dancing with the baby while offering the breast. This dance is done with small jumps and turns. Let us imitate my colleague.”*

**Facilitator 2, moving around the circle formed by the mothers’ chairs, will practice the tete dance, and after about 2 minutes she must pretend that the baby has latched onto the breast.**

**Facilitator 1 will encourage the mothers who start to do it and will praise those who begin, while urging others to join in. However, it should be considered that some mothers may feel sore from a cesarean and prefer not to do the tete dance.**

*“Do not worry if you cannot all dance, because we will send you a video so you can practice at home.*

*Remember that you can also use the rattle bottle along with the tete dance.”*

**Facilitator 2 will stop and ask:**

*“What if my baby still doesn’t breastfeed after all this?*

*Then I must take him/her to a health care facility to be examined by a physician.”*

1. **How do I know if my baby is getting enough milk: (cumulative 100 minutes)**

**Approximate duration**: 15 minutes

**Materials**: baby, 2 white gauze cloth diapers, glass of tap water, 5 ml syringe, chamomile infusion (highly concentrated), poster: ‘How I urinate when I am dehydrated’, poster: How I know if my baby is getting enough milk, white underwear.

**Facilitator 2 will show the poster ‘How I urinate when I am dehydrated’ and will say:**

*“Have you ever been dehydrated because you did not drink enough fluids?”*

She will wait for answers and then ask:

*“What color was your urine when you felt that way?”*

She will thank those who answer and will say:

*“When we are dehydrated from not drinking enough fluids,* *urine is dark yellow, like strong tea. A baby who is breastfeeding well should have very light-colored urine, as we see in this poster.”*

**Facilitator 1 will show scores 1 and 2 of the AUS on the poster ‘How do I know if my baby is getting enough milk’.** On one corner of a cloth diaper folded into four, she will place 5 mL of water to simulate an AUS score of 1. About 10 cm away, she will place 5 mL of very diluted chamomile infusion for a score of 2:

*“First, we will see what color we can find on a diaper of a baby who has taken enough breast milk and looks healthy.*

*This is a score 1 and this other one, score 2, so if this baby looks healthy, most likely he/she has taken enough breast milk.*

*Now we will see what the baby’s diaper looks like when he/she needs more milk.”*

And then, using a syringe, she will place on another corner of the cloth diaper 5 ml of diluted chamomile infusion to resemble a score 3 of the AUS, another 5 ml of less diluted infusion for a score 4, and finally 5 ml of undiluted infusion for a score of 5:

*“This test is called AUS. It should only be used in babies who are 4 days old or older and are exclusively breastfed. Use it on a cloth diaper (not a disposable diaper, because the absorbent gel can affect the color), and read it using fresh urine—within about 3 minutes—because the color can change as it dries. It helps us know whether the baby has taken enough milk. We will practice now.”*

**Facilitator 2 will already have her baby prepared and a diaper folded into a long rectangle to wrap the baby’s genitals and show how the diaper and underwear are placed, and then say:**

*“We will place this diaper on the baby and secure it with the underwear. That is how you will do it at home, and that is why we are giving you cloth diapers, which you only have to use on days 3, 7 and 14 of the follow-up. Now we will see what color the baby’s urine is.”*

**Facilitator 2 will take out the diaper where she had put the chamomile and, while she approaches the score poster, will ask:**

*“How does this urine look to you? What score would you give it?”*

She will repeat this exercise of staining the diaper with chamomile at different dilution levels several times, until all the mothers have participated by reading on the AUS the score and explained what it means.

1. **What to do if my baby is not getting enough milk: (cumulative 110 minutes)**

**Approximate duration**: 10 minutes

**Materials**: baby dressed with hat, shirt, pants, mittens, cardigan, socks, wool coat and fleece blanket; poster: ‘How I know if my baby is getting enough milk’; small spoon.

**Approximate duration**: 10 minutes.

**Facilitator 1 will show the poster and say:**

*“Next, we will talk about what to do if your baby is not getting enough milk. Based on the AUS, here is what we recommend according to the score obtained. If we see a score of 1 or 2, we should continue breastfeeding as usual, but if the score is 3 or higher, we need to act. What would you do if your baby urinates with an AUS score of 3?”*

She will wait for the answers while pointing to the AUS so that they can read and understand it better.

*“If we see a score 3 in fresh urine, what we have to do is breastfeed the baby more frequently, making sure that there is a good latch at the breast and repeat the assessment within the next 2 hours.*

*And what happens if my baby does not want to breastfeed? He/she may be fussy and refuse to latch on, or may be a little sleepier; in that case we will remove some clothing to make him/her more comfortable or to wake him/her up. Let us see how to do this with my colleague*.”

**Facilitator 2 will show her baby and will say:**

*“Sometimes babies are dressed in many layers and they cannot breastfeed because they are uncomfortable, so we will place the baby on the table— you would do this on your bed— and we will remove some clothing, but first my colleague will close the windows and doors so that there are no drafts and the baby does not catch a cold.”*

While she speaks, she will place her baby on the table and remove the fleece blanket, mittens, pants, cardigan and baby’s hat.

*“Now we will move him/her, trying to rock him/her from side to side to wake him/her if he/she is asleep so that we can breastfeed him/her, but if he/she is awake, we will put him/her directly to the breast. When placing him/her at the breast, we cover him/her with the blanket and then dress him/her again without interrupting the breastfeeding session.”*

**Facilitator 1:**

*“And what if my baby still does not want to breastfeed? Then we must dress him/her completely and try to give him/her a little expressed milk with the little spoon and then put him/her to the breast.*

*We can also use as support what we have learned here about how to calm babies who are fussy and do not want to breastfeed.*

*However, if your baby has a fever or is cold, is very difficult to wake up, has not breastfed for more than 4 hours, or is crying inconsolably despite your efforts to soothe him/her, or you feel that he/she is very sick, it is best to take him/her to a health facility in the emergency department.”*

**Facilitator 2**:

*Thank you very much for your participation. Remember that we will also be sending you a video about this to help you remember and put into practice everything you have learned here.*

*Please wait for the application of a 4-question questionnaire in a moment.*

1. **DIGITAL PHASE**

**Digital kit:**

The mothers will receive a digital kit via WhatsApp consisting of short reinforcement videos.

1. **Video package 1:** sent on day 1 after the workshop with the following written message:

*Good afternoon, everyone. On behalf of the Crianzamor research team, we are sending you the first package of videos to help you feel more confident with breastfeeding. These videos are very short, with a maximum duration of 3 minutes each.*

*Please watch them carefully, and feel free to watch them more than once. Practice step by step to help you remember.*

*a) Breastfeeding positions.
b) How I achieve a good latch for breastfeeding.
c) How I express my breast milk.*

*(First and last name of the person responsible for follow-up)
Crianzamor research team*

1. **Video package 2:** sent on the second day after the workshop with the following written message:

*Good afternoon, everyone. On behalf of the Crianzamor research team, we are sending you the second and last package videos. These are also very short, with a maximum duration of 3 minutes each.*

*Please watch them carefully, and feel free to watch them more than once. Practice step by step to help you remember.*

*d) How to soothe the baby’s crying.
e) How to check if he/she is getting enough breast milk.
f) What I do if he/she is not getting enough milk.*

*(First and last name of the person responsible for follow-up)
Crianzamor research team*

**Annexes**

**Annex 1**

**REQUIRED RESOURCES**

**Room:**

A room for up to 30 people near the rooming-in area (or another area where postpartum women are located).

The room should include:

- 3 tables of at least 60 x 60 cm.
- 1 hospital bed or 2 cribs for babies.
- 30 chairs.

The room must have several nearby sinks where hands can be washed with water and soap.

**Facilitators’ kit**:

- 1 infant simulator. Cloth-bodied doll, vinyl face and hands, about 48 to 50 cm in length.
- 1 cloth or knitted breast model.
- 1 set of knitted newborn stomach models.
- 1 set of newborn clothing: cotton layette (hat, shirt, pants, mittens, cardigan and socks), wool coat, and fleece blanket.
- 1 little spoon.
- One 5 mL syringe.
- 50 mL of highly concentrated chamomile infusion.
- 2 clean recycled glass jars (e.g., a jam/coffee jar) with a plastic lid.
- 1 8-ounce plastic bottle.
- 1 400-gram can of powdered formula without label.
- 2 flip charts with stands, A3 size, containing color horizontal posters with the training topics.
- 1 rattle bottle (1-liter disposable bottle, empty and clean, each containing 6 pinto beans).
- 2 bed pillows.
- 2 white gauze cloth diapers.
- 1 white underwear.
- 1 glass (200 mL) of tap water.
- 1 set of office supplies: red and black pens, correction fluid, pencil and eraser, and notebook.
- 1 small hand signs reading: TRUE.
- 1 small hand signs reading: FALSE.
- 1 small hand signs reading: I DON’T KNOW.
- Poster 1: “Formula protects children’s health just as well as breast milk.”
- Poster 2: “Giving formula can lower the production of breast milk.”
- Poster 3: “Formula is cheap and nourishes just as well as breast milk.”

**Mothers’ kit**: Each kit is packed in a cardboard box labeled F (female) or M (male), depending on the type of underwear, so that it can be given to the postpartum woman in accordance with the sex of the newborn.

- 3 white gauze diapers.
- 3 cotton underwear
- 1 self-adhesive wall poster, in color, A3 size, with ‘Signs of hunger’.
- 1 rattle bottle (1-liter disposable bottle, empty and clean, each containing 6 pinto beans).
- 1 small spoon.
- 1 spiral-bound booklet containing:
- Welcome sheet with the mother’s and baby’s first and last names, follow-up dates and contact details of the researcher.
- One A4 color laminated sheet with the AUS.
- One A4 color laminated sheet with the Signs of hunger.

**Annex 2**

**CHECKLIST**

Information will be taken from the data collection form. For each postpartum woman, the facilitator will complete the checklist and record the mobile phone number. A check mark will be added once each required action is completed.

During the face-to-face phase, the ‘Kit box’ and ‘Follow-up contact’ fields will be verified. During the digital phase, the same will be done for Digital Kit videos 1 and 2.

Session date: Start time: End time:

| **Code** | **First and last names** | **Newborn** | | **Mobile phone number** | **Delivery/recording/sending of** | | | |
| --- | --- | --- | --- | --- | --- | --- | --- | --- |
| **M** | **F** | **Box with Kit** | **Mobile phone number of follow-up person** | **Digital kit** | |
| **1** | **2** |
|  |  |  |  |  |  |  |  |  |
|  |  |  |  |  |  |  |  |  |
|  |  |  |  |  |  |  |  |  |
|  |  |  |  |  |  |  |  |  |
|  |  |  |  |  |  |  |  |  |
|  |  |  |  |  |  |  |  |  |
|  |  |  |  |  |  |  |  |  |
|  |  |  |  |  |  |  |  |  |
|  |  |  |  |  |  |  |  |  |
|  |  |  |  |  |  |  |  |  |

Report of observations/incidents:

_______________________________________________________________________________________________________________________________________________________________________________________________________________

_____________________________________________________________________

Person responsible for verification …………………………………………….

Signature …………………………………………………………………………..

**Annex 3**

**ALIGNMENT MATRIX BETWEEN SPECIFIC OBJECTIVES, COMPONENTS OF THE URICLARITY PROGRAM AND THEORETICAL MECHANISMS OF ACTION**

| **Specific objective** | **Section of the workshop / program phase** | **Theoretical mechanism of action** |
| --- | --- | --- |
| To empower postpartum women with key information for the prevention of PIMS | How important is breastfeeding | Increase in knowledge and in the appreciation of the benefits of breastfeeding; reinforcement of the intention to breastfeed through a greater perception of usefulness and protection. |
| To empower postpartum women with key information for the prevention of PIMS | Risks of artificial feeding | Correcting misconceptions about formula; increase in perceived risk regarding the use of breast milk substitutes, which favors informed decisions in favor of breastfeeding. |
| To empower postpartum women with key information for the prevention of PIMS | Signs of hunger in the baby | Improved recognition of early signs of hunger and reduced misinterpretation of crying as “lack of milk”, thereby reducing PIMS. |
| To empower postpartum women with key information for the prevention of PIMS | What normal growth in babies looks like | Readjustment of expectations regarding physiological growth patterns; reduction of overinterpretation of normal variations as “a baby who is not feeding well”. |
| To empower postpartum women with key information for the prevention of PIMS | Digital phase – Videos 1 and 2 (reinforcement of key workshop contents) | Reinforcement of the information received through brief reminders; consolidation of content and prevention of forgetting in the immediate post-discharge period. |
| To contribute to the generation of self-efficacy in postpartum women | Breastfeeding positions | Experiential training and guided practice of positions; generation of mastery experiences and increased confidence to position the baby at the breast without help. |
| To contribute to the generation of self-efficacy in postpartum women | Manual breast milk expression | Development of practical skills through “learning by doing”; increased perception of control over breast milk production and availability. |
| To contribute to the generation of self-efficacy in postpartum women | How I calm my baby’s crying | Training in specific soothing strategies; decreased sense of incapacity in the face of crying and reduced attribution of crying to “lack of milk”. |
| To contribute to the generation of self-efficacy in postpartum women | Group interactions, dynamics and workshop closure (thanks, brief questionnaire) | Social modeling and peer support; verbalization of achievements; positive reinforcement that increases perceived self-efficacy to breastfeed and manage everyday difficulties. |
| To contribute to the generation of self-efficacy in postpartum women | Digital phase – Videos 1 and 2 (brief demonstrations that can be repeated at home) | Repeated visual demonstrations that can be revisited at home; support for transferring workshop skills to everyday caregiving. |
| To equip postpartum women with skills to monitor their milk transfer | How I know if my baby is getting enough milk (introduction and practice with the AUS) | Training in the use of the AUS and in interpreting urine color; development of a simple, objective tool to assess hydration and milk intake. |
| To equip postpartum women with skills to monitor their milk transfer | What I do if my baby is not getting enough milk (score interpretation and decision-making) | Linking AUS scores to specific actions (increasing frequency, improving latch, timely clinical advice); strengthening the capacity to respond to warning signs. |
| To equip postpartum women with skills to monitor their milk transfer | Follow-up instructions: scheduled contacts on days 3, 7, and 14; recording AUS and MILQ | Establishment of a periodic monitoring routine; reinforcement of AUS use and recording of feeding and warning signs. |
| To equip postpartum women with skills to monitor their milk transfer | Digital phase – Video 2 (How to check if he/she is getting enough breast milk; What I do if he/she is not getting enough milk) | Visual and sequential reinforcement of the steps for assessment and response to possible low milk transfer; support for timely decision-making at home. |
