# Supplementary material for: Uriclarity Program Reduces Perceived Insufficient Milk Supply in Early Postpartum: Randomized Controlled Trial
Source: Research Square preprint supplement (doi:10.21203/rs.3.rs-8634552/v1), 2026-01-29
Supplement: Supplementary file 1 [file a7550bdb40113a2b5bdb6551.pdf]

# How much milk did your baby drink?

## Ashiyama Uriscale

Before 3 minutes have passed after your baby pees, the color that predominates when they urinate on a white cloth diaper tells you how much milk they have drunk. The Uriscale is used in babies who are exclusively breastfed and older than 3 days of life.

### Color and score

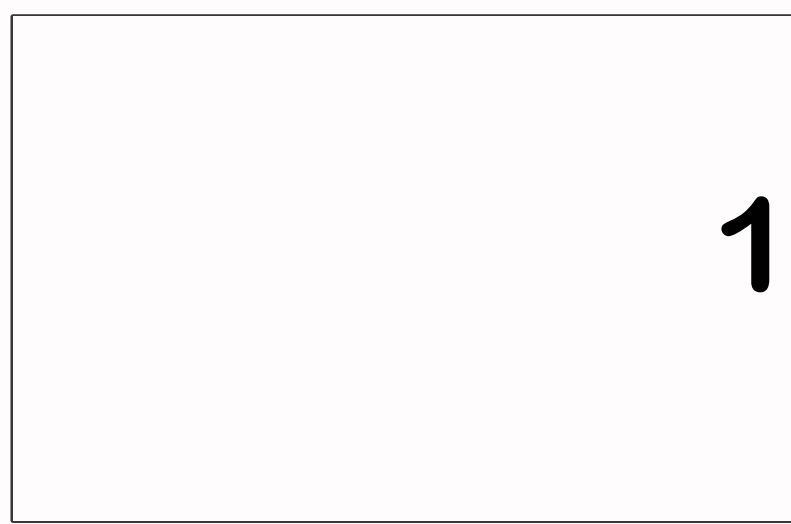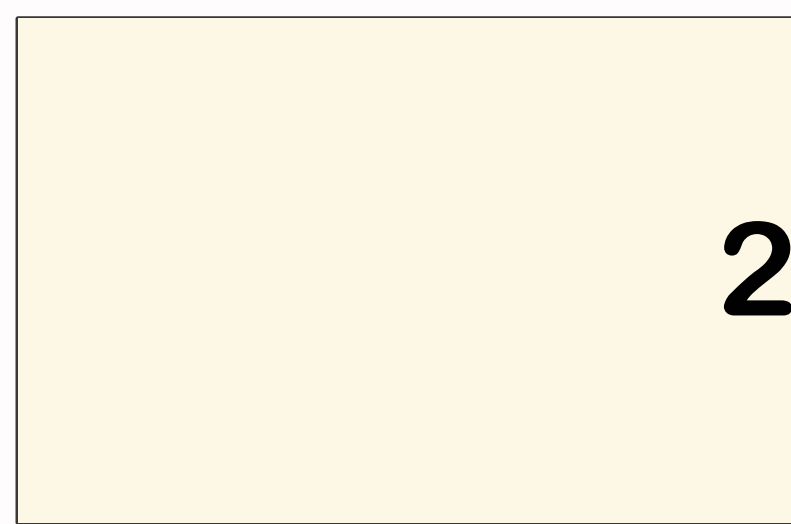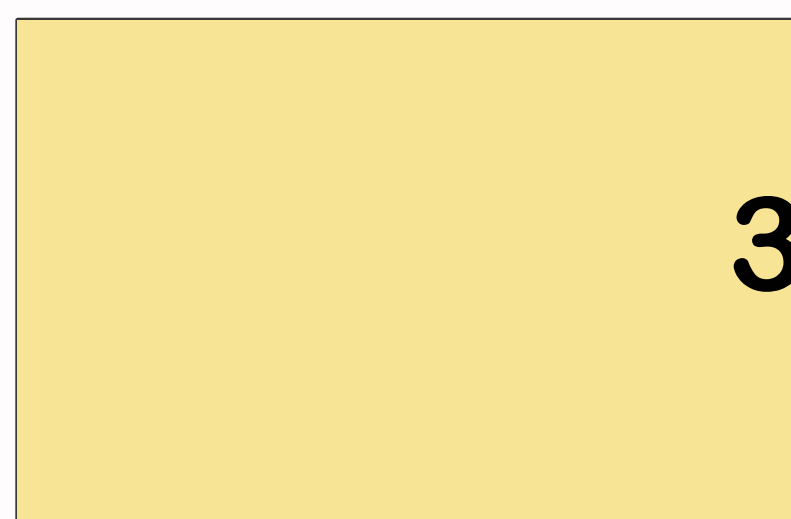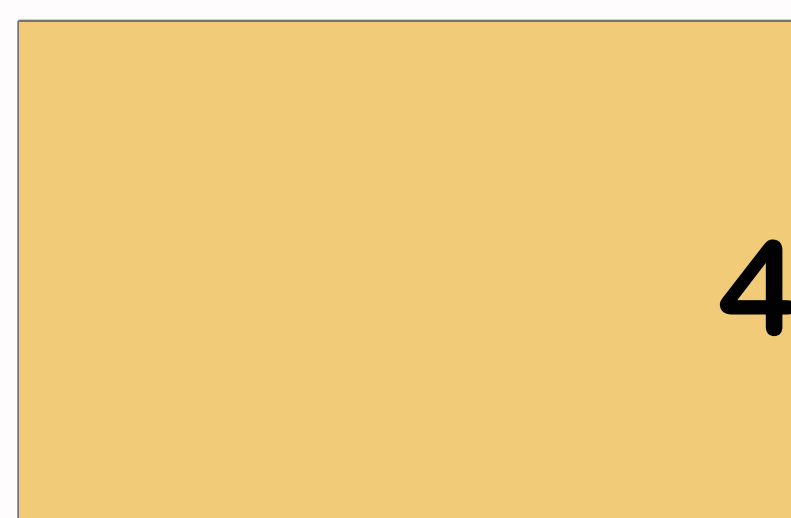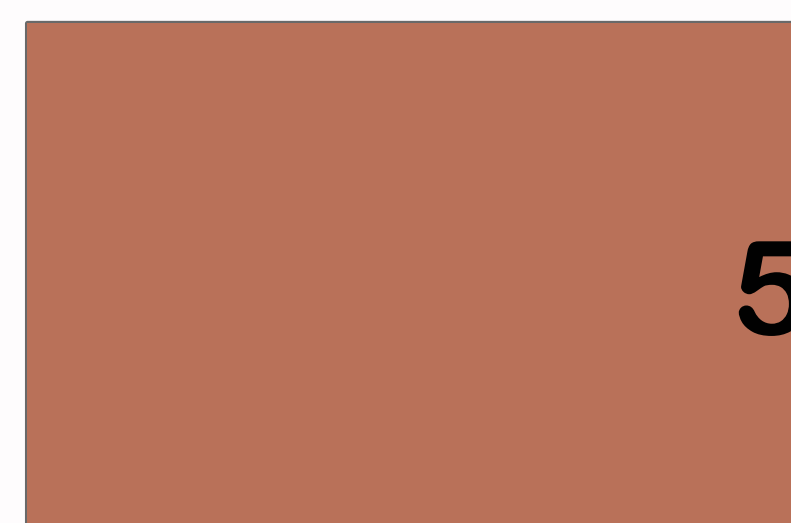

### Interpret the color according to your baby's

If your baby looks healthy and, when awake, looks active, this urine color tells us that he/she has received **PLENTY** of breast milk.

If your baby looks healthy and, when awake, looks active, this urine color tells us that he/she has received **ENOUGH** breast milk.

If your baby is a bit fussy or very sleepy, this urine color tells us that he/she has received **LITTLE** milk. You should breastfeed more often and repeat this evaluation in 2 hrs; if your baby stays the same or gets worse, seek help.

If your baby is fussy or very sleepy, this urine color tells us that he/she has received **VERY LITTLE** breast milk. You should seek health care right now.

If your baby's urine is this color, he/she has received **ALMOST NO** breast milk, is in danger, and you must seek emergency medical care.

Do not use the Uriscale to evaluate:

- \* The first urine of the morning.
- \* A disposable diaper or a diaper with stool.

Use good lighting.

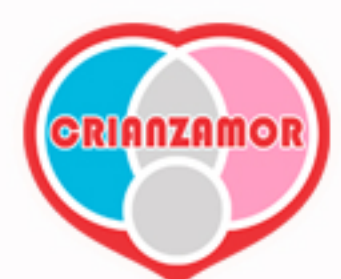

Send us your comments: [jackelineashiyama@crianzamor.org](mailto:jackelineashiyama@crianzamor.org)  
Whatsapp +51 986029160.
